# Supplementary material
Source: Springer Nature journal article supplement (https://www.springermedizin.de/resource/supplementary/12916_2013_981_MOESM8_ESM.pdf/9598756)
Supplement: MOESM8 [file 9598756]

**Supplementary Table 8:** Differential mRNA expression ( $q < 0.05$ ) of candidate genes for obesity in human pancreatic islets exposed to palmitate versus control. DNA methylation data is displayed if the absolute difference in DNA methylation  $\geq 3\%$  and  $P < 0.05$ .

| Obesity candidate gene | mRNA expression |     |                       |                         |                         |         |         | DNA methylation (%) |                  |                       |                         |                         |         |
|------------------------|-----------------|-----|-----------------------|-------------------------|-------------------------|---------|---------|---------------------|------------------|-----------------------|-------------------------|-------------------------|---------|
|                        | Probe ID        | Chr | Control mean $\pm$ sd | Palmitate mean $\pm$ sd | Diff. palmitate-control | P-value | q-value | Probe ID            | Region           | Control mean $\pm$ sd | Palmitate mean $\pm$ sd | Diff. palmitate-control | P-value |
| <i>ASAH1</i>           | 8149534         | 8   | 2,772.5 $\pm$ 351.5   | 2,517.6 $\pm$ 434.2     | -254.9                  | 0.0017  | 0.033   |                     |                  |                       |                         |                         |         |
| <i>DNM3</i>            | 7907370         | 1   | 51.6 $\pm$ 11.7       | 62.1 $\pm$ 17.4         | 10.6                    | 0.0017  | 0.033   | cg21450888          | Body; Open sea   | 70.8 $\pm$ 5.7        | 75.0 $\pm$ 8.4          | 4.2                     | 0.041   |
|                        |                 |     |                       |                         |                         |         |         | cg10769535          | Body; Open sea   | 66.4 $\pm$ 4.4        | 71.5 $\pm$ 3.7          | 5.1                     | 0.001   |
| <i>GP2</i>             | 7999920         | 16  | 661.9 $\pm$ 420.1     | 475.1 $\pm$ 388.5       | -186.8                  | 0.0012  | 0.027   |                     |                  |                       |                         |                         |         |
| <i>GPRC5B</i>          | 7999909         | 16  | 796.9 $\pm$ 322.0     | 586.9 $\pm$ 262.5       | -210.0                  | 0.0002  | 0.013   |                     |                  |                       |                         |                         |         |
| <i>GRB14</i>           | 8056327         | 2   | 97.5 $\pm$ 15.5       | 81.5 $\pm$ 24.1         | -16.0                   | 0.0024  | 0.041   |                     |                  |                       |                         |                         |         |
| <i>HNF4G</i>           | 8146986         | 8   | 123.1 $\pm$ 43.5      | 99.8 $\pm$ 32.8         | -23.3                   | 0.0005  | 0.017   |                     |                  |                       |                         |                         |         |
| <i>ITPR2</i>           | 7961900         | 12  | 204.8 $\pm$ 36.8      | 172.7 $\pm$ 38.7        | -32.1                   | 0.0005  | 0.017   |                     |                  |                       |                         |                         |         |
| <i>KLF9</i>            | 8161648         | 9   | 230.1 $\pm$ 29.3      | 211.0 $\pm$ 28.2        | -19.1                   | 0.0012  | 0.027   |                     |                  |                       |                         |                         |         |
| <i>LAMA2</i>           | 8121949         | 6   | 73.7 $\pm$ 37.0       | 57.7 $\pm$ 20.2         | -16.0                   | 0.0034  | 0.049   | cg15002362          | Body; Open sea   | 49.5 $\pm$ 6.4        | 52.9 $\pm$ 7.7          | 3.4                     | 0.014   |
|                        |                 |     |                       |                         |                         |         |         | cg23621912          | Body; Open sea   | 36.5 $\pm$ 4.7        | 40.0 $\pm$ 3.6          | 3.5                     | 0.003   |
| <i>OLFM4</i>           | 7969288         | 13  | 6,063.4 $\pm$ 1,604.4 | 4,926.3 $\pm$ 2,045.2   | -1,137.1                | 0.0024  | 0.041   |                     |                  |                       |                         |                         |         |
| <i>PCSK1</i>           | 8113234         | 5   | 4,238.9 $\pm$ 1,705.4 | 5,381.2 $\pm$ 1,765.8   | 1,142.3                 | 0.0002  | 0.013   |                     |                  |                       |                         |                         |         |
| <i>RARB</i>            | 8078286         | 3   | 83.4 $\pm$ 20.4       | 51.8 $\pm$ 17.7         | -31.6                   | 0.0002  | 0.013   |                     |                  |                       |                         |                         |         |
| <i>RASAL2</i>          | 7907611         | 1   | 114.5 $\pm$ 20.7      | 101.4 $\pm$ 14.8        | -13.1                   | 0.0017  | 0.033   | cg00112588          | TSS1500; N Shore | 53.7 $\pm$ 4.6        | 56.7 $\pm$ 3.7          | 3.0                     | 0.017   |
|                        |                 |     |                       |                         |                         |         |         | cg22685215          | Body; Open sea   | 56.7 $\pm$ 5.4        | 60.0 $\pm$ 5.8          | 3.4                     | 0.024   |
| <i>RPL27A</i>          | 7938295         | 11  | 145.9 $\pm$ 40.1      | 124.9 $\pm$ 30.5        | -21.0                   | 0.0034  | 0.049   |                     |                  |                       |                         |                         |         |
| <i>UBE2E3</i>          | 8046685         | 2   | 310.0 $\pm$ 22.3      | 276.8 $\pm$ 26.8        | -33.2                   | 0.0017  | 0.033   |                     |                  |                       |                         |                         |         |
